# Supplementary material for: Crowding-induced collapse and adsorption of polymers with nonuniform bending stiffness
Source: Royal Society of Chemistry journal article supplement (doi:10.1039/d6sm00383d), 2026-05-14
Supplement: d6sm00383d1.pdf [file d6sm00383d1.pdf]

## **Supplementary Information**

### **Crowding-induced collapse and adsorption of polymers with nonuniform bending stiffness**

Gregory R. Cantrall, Gaurav Chauhan, and Steven M. Abel

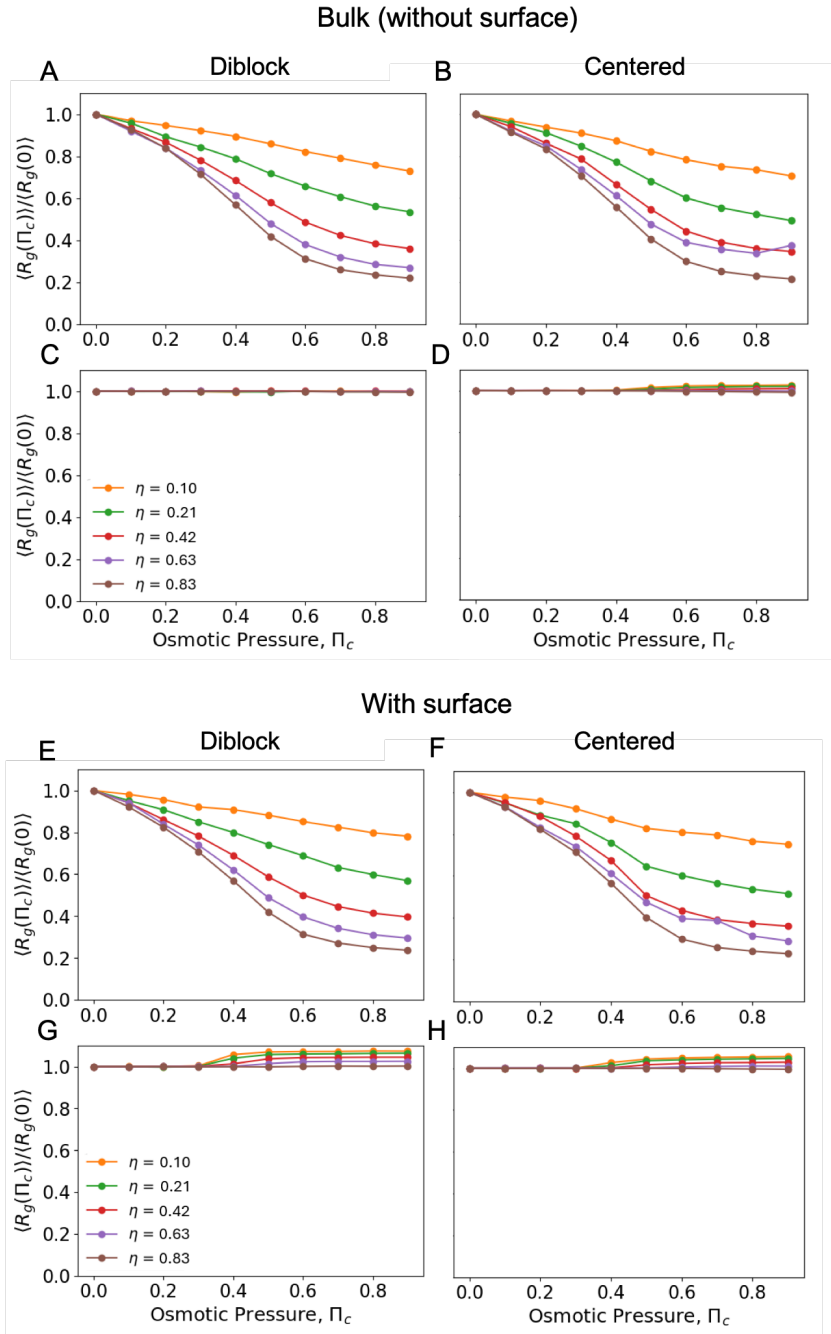

Figure 1: Normalized radius of gyration determined separately for flexible and semiflexible domains of the diblock and centered patterns. (A-D) In bulk. (E-H) With a surface. (A,E) Flexible domain of the diblock pattern. (B,F) Flexible domain of the centered pattern. (C,G) Semiflexible domain of the diblock pattern. (D,H) Semiflexible domain of the centered pattern.

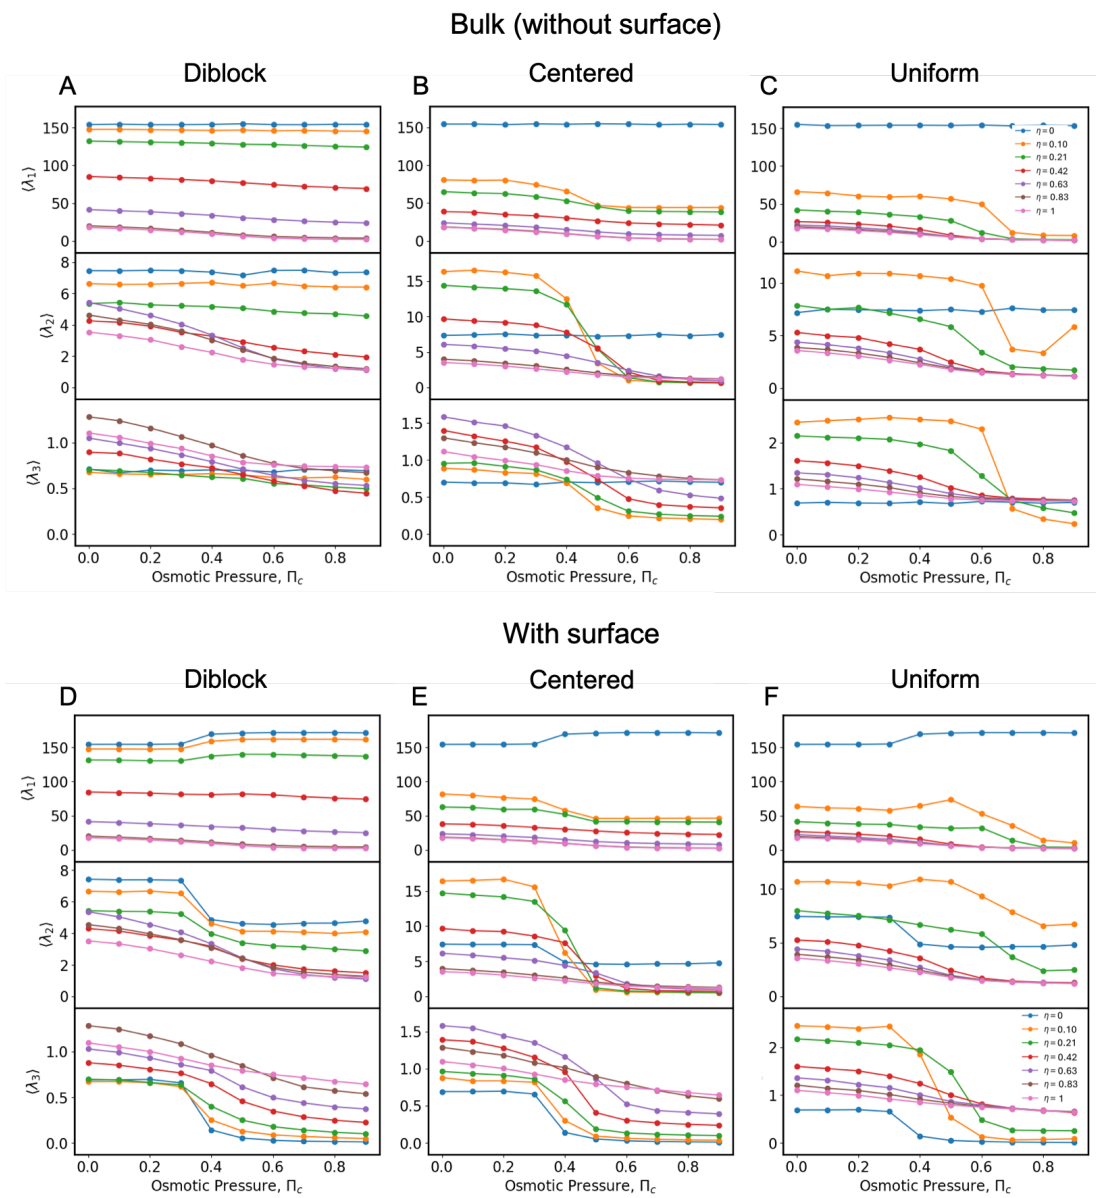

Figure 2: Average eigenvalues ( $\lambda_1 \geq \lambda_2 \geq \lambda_3$ ) of the gyration tensor. (A-C) In bulk. (D-F) With a surface. (A,D) Diblock. (B,E) Centered. (C,F) Uniform.

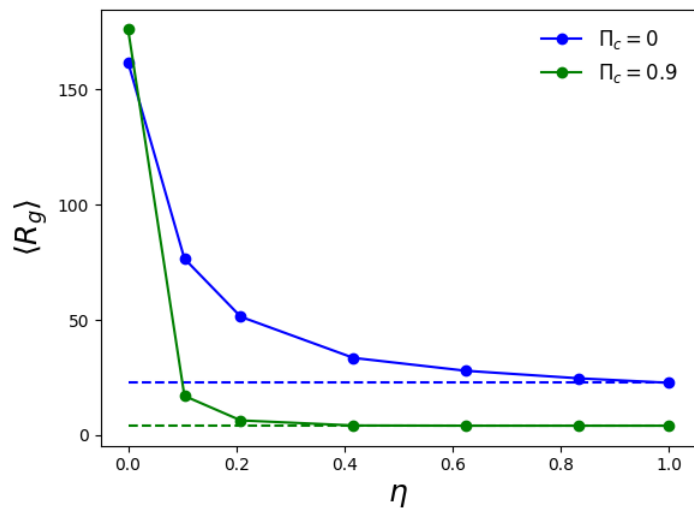

Figure 3: Radius of gyration for uniform polymers in bulk at osmotic pressures of  $\Pi_c = 0$  and  $\Pi_c = 0.9$ . Dashed lines correspond to the values at  $\eta = 1$ , and are included to facilitate comparison.

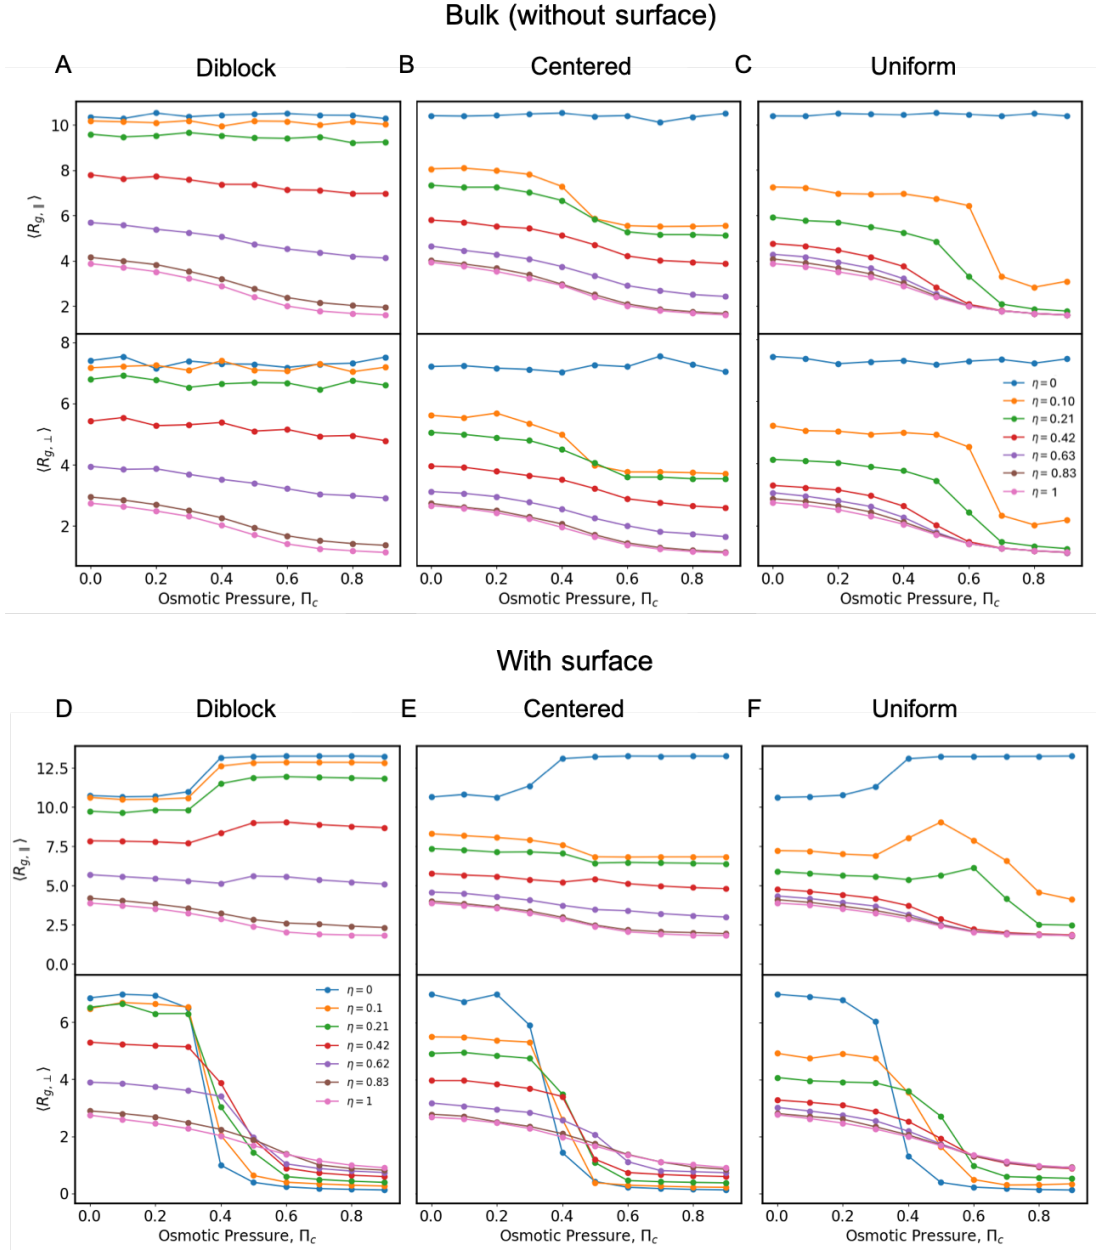

Figure 4: Mean radius of gyration parallel to the surface ( $R_{g,\parallel}$ ) and perpendicular to the surface ( $R_{g,\perp}$ ). For polymers in bulk, the radius of gyration was computed in the  $x$ - and  $y$ -direction for  $R_{g,\parallel}$  and in the  $z$ -direction for  $R_{g,\perp}$ , even though no surface was present. (A-C) In bulk. (D-F) With a surface. (A,D) Diblock. (B,E) Centered. (C,F) Uniform.

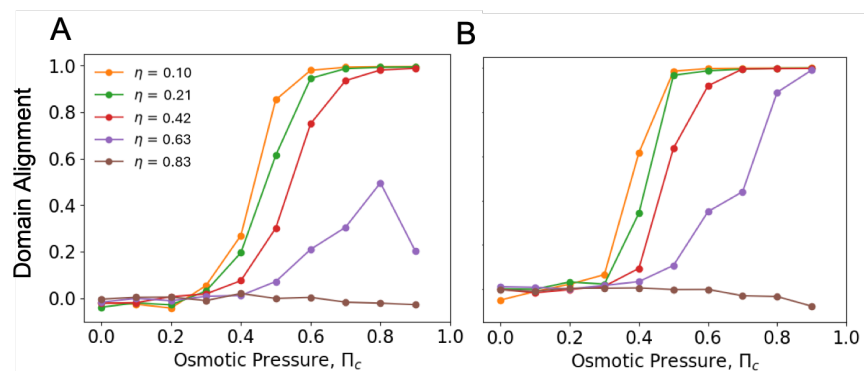

Figure 5: Domain alignment between the two semiflexible arms of a polymer with a centered pattern of flexibility. The alignment is characterized by the dot product of the normalized end-to-end vectors of the semiflexible domains. (A) In bulk. (B) With a surface.

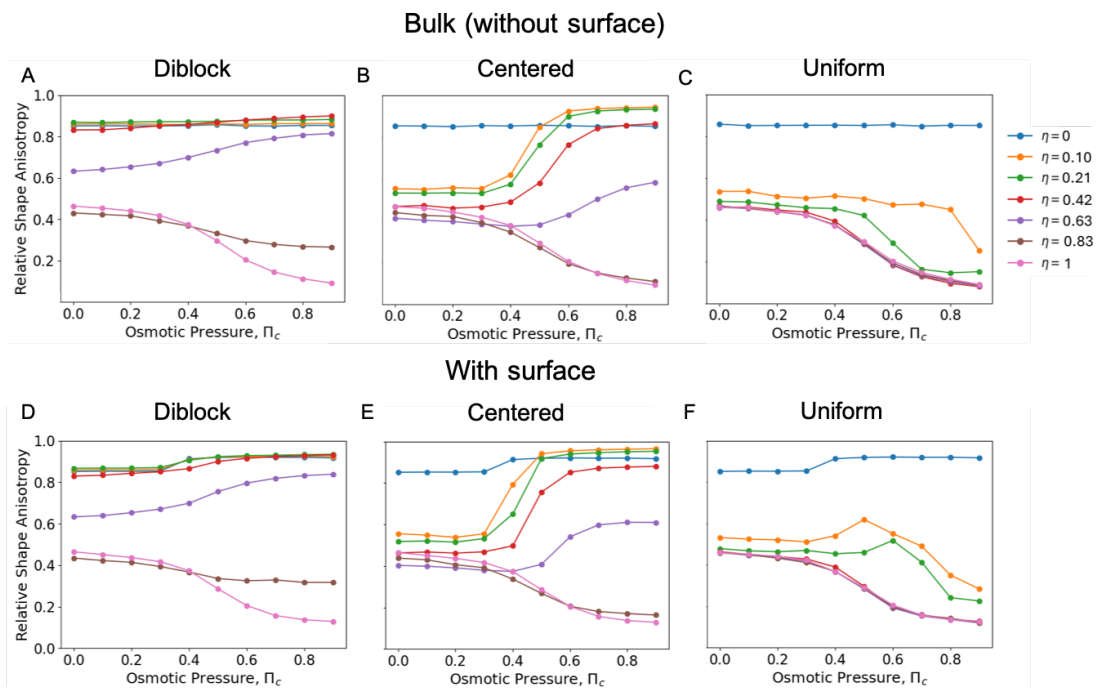

Figure 6: Relative shape anisotropy. (A-C) In bulk. (D-F) With a surface. (A,D) Diblock. (B,E) Centered. (C,F) Uniform.
